# Supplementary material for: Grey Matter Volumes in Children with Conduct Problems and Varying Levels of Callous-Unemotional Traits
Source: J Abnorm Child Psychol. 2015 Sep 14;44:639–49. doi: 10.1007/s10802-015-0073-0 (PMC4830891; doi:10.1007/s10802-015-0073-0)
Supplement: Supplementary file 3 — (XLSX 20 kb) [file 10802_2015_73_MOESM2_ESM.xlsx]

## Sheet: Sheet1
Brain Region	BA	L/R	Peak voxel MNI coordinates			k	t
TD> CP
Inferior parietal lobule	2	L	-58.5	-27	45	211	4.78031
Orbitofrontal cortex	47	R	37.5	34.5	-7.5	570	4.63418
ext. anterior insula	47	R	33	24	-18		3.91085
ext. orbitofrontal cortex	47	R	25.5	33	-7.5		3.45558
Superior occipital cortex	18	R	18	-93	6	67	4.35534
Inferior temporal gyrus	20	L	-36	-7.5	-33	72	4.21119
Orbitofrontal cortex	47	L	-36	36	-7.5	318	4.19567
	47	L	-36	48	-18		4.03421
ext. inferior frontal gyrus	47	L	-28.5	33	-7.5		3.36987
Inferior frontal gyrus (triangularis)	9	L	-40.5	12	27	258	4.14784
ext. precentral gyrus	44	L	-37.5	4.5	30		3.56743
Inferior parietal lobe	7	L	-31.5	-73.5	42	160	4.14659
ext. middle occipital lobe	39	L	-39	-72	30		3.60914
ext. middle occipital lobe	39	L	-45	-75	34.5		3.45401
Middle temporal gyrus	21	R	63	-16.5	-13.5	96	3.97638
	21	R	72	-21	-18		3.60197
Middle frontal Gyrus	8	L	-28.5	18	48	98	3.97146
	9	L	-27	19.5	39		3.81527
	9	L	-30	25.5	43.5		3.3587
Precentral gyrus	44	R	49.5	7.5	36	349	3.92956
Inferior frontal gyrus (opercularis)	44	R	40.5	9	30		3.74491
Inferior parietal lobe	40	L	-45	-39	49.5	88	3.92279
Lingual gyrus	18	R	15	-81	-3	179	3.91654
	19	R	21	-66	1.5		3.90134
	18	R	19.5	-72	-6		3.72754
Cerebellum	-	L	-30	-55.5	-58.5	86	3.77958
Posterior cingulate cortex	23	L	-7.5	-39	34.5	193	3.74137
	23	L	-9	-48	33		3.55905
Anterior cingulate cortex	32	R	6	45	18	52	3.64327
ext. superior frontal gyrus	32		0	49.5	21		3.33722
Supra marginal gyrus	42	R	61.5	-43.5	25.5	57	3.58205
ext. superior frontal gyrus	48	R	63	-33	24		3.3104
Precuneus	7	R	7.5	-48	39	60	3.50121
		R	16.5	-46.5	40.5		3.30667
TD>CP/HCU
Middle frontal gyrus	9	L	-25.5	19.5	39	543	5.09625
	8	L	-28.5	18	46.5		4.82443
Inferior parietal lobule	2	L	-58.5	-27	45	549	4.98194
	40	L	-49.5	-39	51		4.28904
	2	L	-34.5	-43.5	60		3.61121
Inferior frontal gyrus (opercularis)	44	R	36	7.5	27	475	4.63069
	44	R	42	10.5	33		4.5345
ext. precentral gyrus	44	R	49.5	7.5	36		4.11148
Middle frontal gyrus	46	R	34.5	52.5	13.5	203	4.58968
	46	R	36	48	21		4.14209
Orbitofrontal cortex	47	L	-37.5	43.5	-6	309	4.38633
	47	L	-36	48	-16.5		3.82417
	47	L	-34.5	34.5	-9		3.80571
Orbitofrontal cortex	47	R	39	36	-7.5	248	4.37869
	47	R	43.5	43.5	-4.5		3.73473
	47	R	25.5	33	-7.5		3.35173
Anterior cingulate cortex	32	R	7.5	45	18	181	4.24271
Middle frontal gyrus	10	L	-34.5	57	7.5	74	4.00866
Precuneus	23	L	-15	-55.5	30	153	4.00717
ext. posterior cingulate cortex	23	L	-9	-49.5	31.5		3.87023
Postcentral gyrus	43	L	-58.5	-3	16.5	70	4.00085
Middle Occipital lobe	19	L	-37.5	-72	31.5	90	3.94644
ext. inferior parietal lobule	7	L	-33	-72	40.5		3.33563
Posterior cingulate cortex	23	L	-7.5	-37.5	33	178	3.88527
ext. mid cingulate cortex	23	R	6	-36	34.5		3.83108
Superior medial frontal gyrus	9	R	9	54	33	115	3.8189
	10	R	7.5	64.5	33		3.71789
Superior frontal gyrus	10	R	27	60	10.5	63	3.78601
Medial orbitofrontal cortex	11	R	7.5	24	-13.5	72	3.72971
Gyrus rectus	11	R	1.5	37.5	-21	97	3.70512
Middle frontal gyrus	44	L	-43.5	18	36	94	3.69902
Cerebellum	-	L	-12	-63	-58.5	118	3.6949
Anterior insula	47	R	33	24	-18	111	3.69033
Cuneus	18	R	7.5	-96	27	62	3.68238
Angular gyrus	7	R	33	-63	46.5	58	3.63671
	7	R	36	-55.5	43.5		3.53282
Cerebellum	-	L	-37.5	-48	-36	106	3.55566
TD>CP/LCU
Middle temporal gyrus	21	R	63	-18	-13.5	173	4.74509
	21	R	70.5	-18	-16.5		4.10226
Fusiform gyrus	19	R	31.5	-70.5	-6	54	4.38598
Inferior frontal gyrus (opercularis)	44	L	-36	3	28.5	211	4.00533
ext. triangularis	44	L	-42	12	27		3.7972
Inferior parietal lobe	7	L	-31.5	-73.5	40.5	75	3.96841
Supra marginal gyrus	40	R	60	-43.5	25.5	59	3.91266
Orbitofrontal cortex	47	R	39	34.5	-7.5	60	3.8139
Lingual gyrus	18	R	15	-79.5	-4.5	59	3.68209
CP/LCU>CP/HCU
Middle frontal gyrus	9	L	-22.5	33	45	533	4.52326
ext. superior frontal gyrus	8	L	-19.5	21	42		4.01016
ext. superior frontal gyrus	9	L	-18	43.5	48		3.60802
Superior temporal gyrus	20	L	-39	-15	-9	225	4.43526
Inferior parietal lobe	7	L	-28.5	-54	43.5	269	4.4222
	40	L	-36	-48	37.5		3.96425
ext. superior parietal lobe	7	L	-28.5	-58.5	55.5		3.39146
Orbitofrontal cortex	47	L	-39	43.5	-6	64	4.31375
Superior frontal gyrus	32	L	-12	45	31.5	76	4.08928
	9	L	-16.5	51	34.5		3.49001
Middle frontal gyrus	9	R	25.5	22.5	37.5	117	3.99531
Insula	13	R	34.5	-6	18	299	3.77298
Rolandic operculum	-	R	42	-1.5	13.5		3.45541
Gyrus rectus	11		0	39	-25.5	52	3.51765
Paracentral lobule	4	L	-12	-31.5	63	59	3.46949
